# Supplementary material for: Dual Blockade of TGF-β Receptor and Endothelin Receptor Synergistically Inhibits Angiotensin II-Induced Myofibroblast Differentiation: Role of AT1R/Gαq-Mediated TGF-β1 and ET-1 Signaling
Source: MDPI journal article supplement (doi:10.3390/ijms24086972), 2023-04-09
Supplement: s1 [file s1]

Supplementary information

Supplementary figure S1

A mRNA expression of fibrotic markers

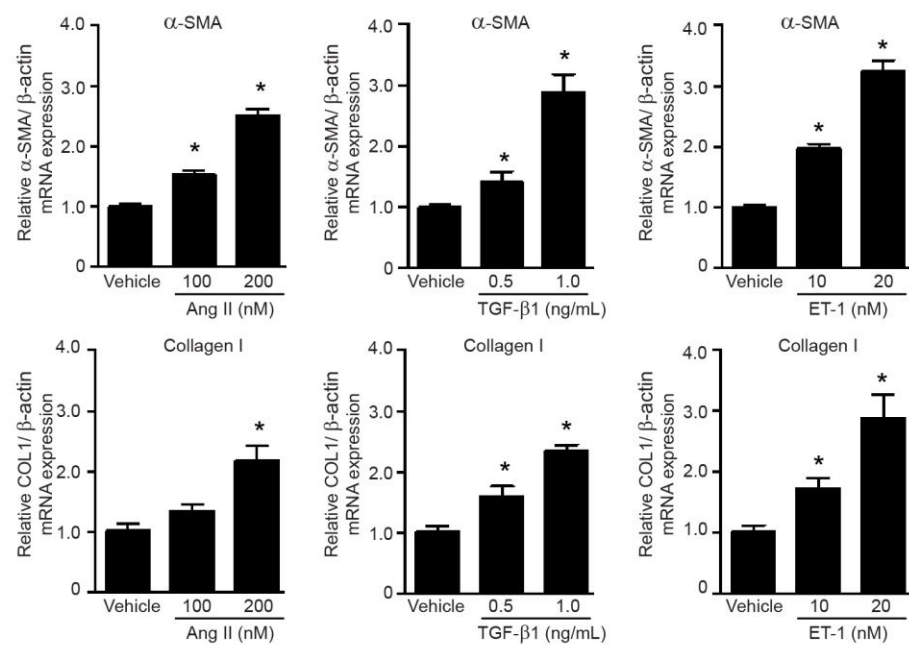

B  $\alpha$ -SMA expression

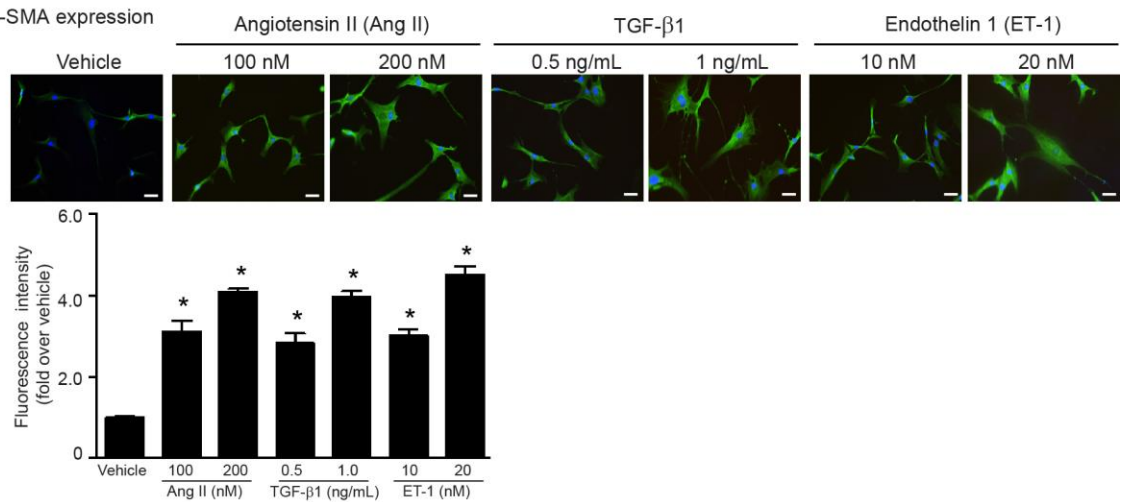

C Stress fiber

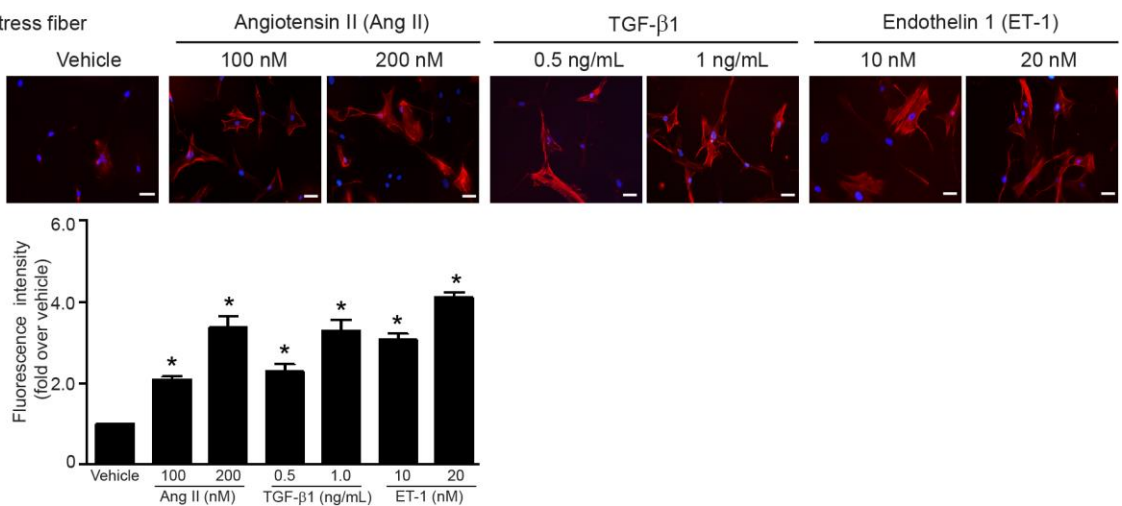



**Supplementary Figure S1. Treatment with Ang II, TGF- $\beta$ 1, or ET-1 induced myofibroblast differentiation in a dose-dependent manner**

Serum-starved fibroblasts were incubated with different doses of Ang II (100 and 200 nM), TGF- $\beta$ 1 (0.5 and 1 ng/mL), and ET-1 (10 and 20 nM) for 6 h (A) or 24 h (B-C). (A) Relative mRNA levels of fibrotic markers,  $\alpha$ -SMA and collagen I were analyzed by real-time qRT-PCR. After the treatment, immunofluorescence staining was used to determine  $\alpha$ -SMA expression (green) (B) and stress fiber formation (red) (C). Nuclei were stained with DAPI (blue). Scale bar represents 10  $\mu$ m. \*;  $P < 0.05$  vs. vehicle.  $N = 3$  and data were presented as the mean  $\pm$  SEM.
